# Supplementary material
Source: Springer Nature journal article supplement (https://www.springermedizin.de/resource/supplementary/12947_2006_118_MOESM2_ESM.pdf/9556248)

MI: 1.6  
S3  
04 APR 06  
18:09:43  
2/2/E/HS  
C.N.R. FISIOLOGIA  
CLINICA  
ADULTI 1

0:28:57  
GUAD 55  
COMP 66

17CM  
64HZ

E  
P 1.6 3.2 R

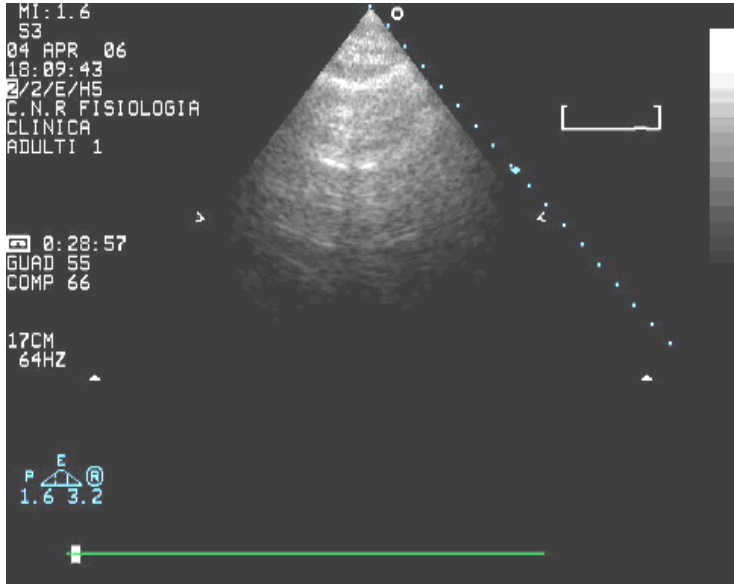

04/04/06 18:09

16  
↑  
↑

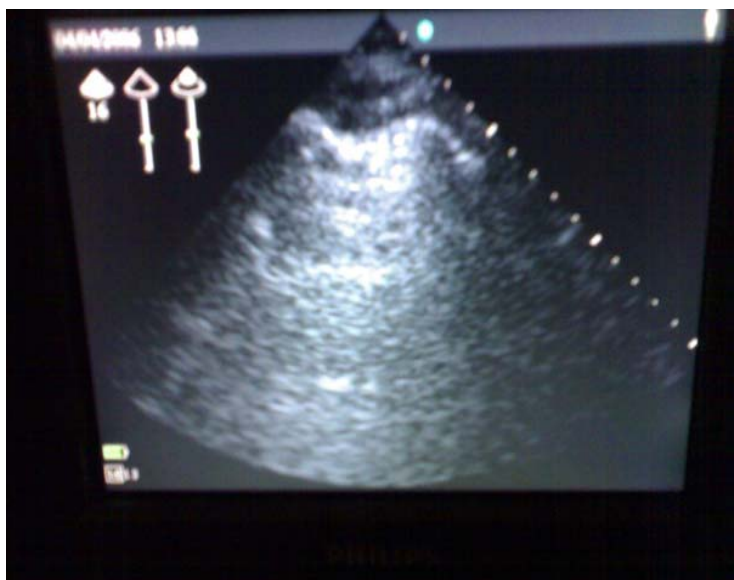

Supplement: MOESM2 [file 9556248]
